# Supplementary material
Source: ML conference proceedings conference paper supplement (https://proceedings.neurips.cc/paper_files/paper/2019/hash/14da15db887a4b50efe5c1bc66537089-Abstract.html)
Supplement: Supplementary file [file 14da15db887a4b50efe5c1bc66537089-Supplemental.zip]

## A Proof of the discrete-time gradient descent

### A.1 Invariant matrices

The zero-asymmetry initialization (3.1) gives  $D_l(0) = 0$ ,  $l = 1, \dots, L-2$  and  $I + D_{L-1}(0) = 0$ . Lemma 4.2 proved that  $D_l$ 's are indeed invariances in continuous gradient descent, and then the gradient  $\|\nabla_L \mathcal{R}\|_F^2$  can be lower bounded by the current loss  $\mathcal{R}$  (4.4). Here we will show that  $\|\nabla_L \mathcal{R}\|_F^2 \geq \mathcal{R}$  still holds if  $D_l$ 's are only *approximately invariant*, i.e.,  $D_l$ ,  $l = 1, \dots, L-2$  and  $I + D_{L-1}$  are close to 0.

**Lemma A.1.** Assume that the weight matrices  $\|W_l\|_2 \leq \alpha$ ,  $l = 1, \dots, L-1$  and the invariant matrices  $\|D_l\|_2 \leq \delta$ ,  $l = 1, \dots, L-2$ , then

$$\left\| W_{L-1:1} W_{L-1:1}^\top - (W_{L-1} W_{L-1}^\top)^{L-1} \right\|_2 \leq \frac{1}{2} L^2 \alpha^{2(L-2)} \delta. \quad (\text{A.1})$$

*Proof.* We will proof the following statement by induction

$$\left\| W_{l:1} W_{l:1}^\top - (W_l W_l^\top)^l \right\|_2 \leq \frac{l(l-1)}{2} \alpha^{2(l-1)} \delta, \quad l = 1, \dots, L-1. \quad (\text{A.2})$$

The statement holds for  $l = 1$  obviously. Assume that the statement holds for  $l$ , now consider  $l+1$ ,

$$\begin{aligned} & \left\| W_{l+1:1} W_{l+1:1}^\top - (W_{l+1} W_{l+1}^\top)^{l+1} \right\|_2 \\ &= \left\| W_{l+1} \left[ W_{l:1} W_{l:1}^\top - (W_l W_l^\top)^l + (W_l W_l^\top)^l - (W_{l+1}^\top W_{l+1})^l \right] W_{l+1}^\top \right\|_2 \\ &\leq \|W_{l+1}\|_2 \left[ \left\| W_{l:1} W_{l:1}^\top - (W_l W_l^\top)^l \right\|_2 + \left\| (W_l W_l^\top)^l - (W_{l+1}^\top W_{l+1})^l \right\|_2 \right] \|W_{l+1}^\top\|_2 \\ &\leq \alpha^2 \left[ \frac{l(l-1)}{2} \alpha^{2(l-1)} \delta + \left\| (W_l W_l^\top)^l - (W_{l+1}^\top W_{l+1})^l \right\|_2 \right], \end{aligned}$$

and

$$\begin{aligned} & \left\| (W_l W_l^\top)^l - (W_{l+1}^\top W_{l+1})^l \right\|_2 \\ &= \left\| \sum_{k=0}^{l-1} (W_l W_l^\top)^{l-1-k} (W_l W_l^\top - W_{l+1}^\top W_{l+1}) (W_{l+1}^\top W_{l+1})^k \right\|_2 \\ &\leq \sum_{k=0}^{l-1} \|W_l W_l^\top\|_2^{l-1-k} \|W_l W_l^\top - W_{l+1}^\top W_{l+1}\|_2 \|W_{l+1}^\top W_{l+1}\|_2^k \\ &\leq \sum_{k=0}^{l-1} \alpha^{2(l-1-k)} \delta \alpha^{2k} = l \alpha^{2(l-1)} \delta, \end{aligned}$$

thus

$$\left\| W_{l+1:1} W_{l+1:1}^\top - (W_{l+1} W_{l+1}^\top)^{l+1} \right\|_2 \leq \alpha^2 \left[ \frac{l(l-1)}{2} \alpha^{2(l-1)} \delta + l \alpha^{2(l-1)} \delta \right] = \frac{l(l+1)}{2} \alpha^{2l} \delta.$$

So the statement (A.2) also holds for  $l+1$ , and we complete the proof of the lemma.  $\square$

**Lemma A.2.** Assume that the weight matrices  $\|W_l\|_2 \leq \alpha$ ,  $l = 1, \dots, L-1$ , where  $1 \leq \alpha^{2(L-1)} < L\phi^2$  for some  $\phi > 0$ ; assume that the invariant matrices  $\|D_l\|_2 \leq \delta$ ,  $l = 1, \dots, L-2$  and  $\|I + D_{L-1}\|_2 \leq \varepsilon$ , where  $\delta \leq (2L^3\phi^2)^{-1}$  and  $\varepsilon \leq (4L^2)^{-1}$ . Then  $\|\nabla_L \mathcal{R}\|_F^2 \geq \mathcal{R}$ .

*Proof.* From Lemma A.1,

$$\lambda_{\min} (W_{L-1:1} W_{L-1:1}^\top) \geq \lambda_{\min}^{L-1} (W_{L-1} W_{L-1}^\top) - \frac{1}{2} L^2 \alpha^{2(L-2)} \delta.$$

Since  $\|I + W_L^\top W_L - W_{L-1} W_{L-1}^\top\|_2 \leq \varepsilon$ ,

$$\lambda_{\min} (W_{L-1} W_{L-1}^\top) \geq \lambda_{\min} (I + W_L^\top W_L) - \varepsilon \geq 1 - \varepsilon.$$

Similar to (4.4), we have

$$\begin{aligned}\|\nabla_L \mathcal{R}\|_F^2 &\geq 2\lambda_{\min}(W_{L-1:1}W_{L-1:1}^\top) \mathcal{R} \\ &\geq 2 \left[ (1-\varepsilon)^{L-1} - \frac{1}{2}L^2\alpha^{2(L-2)}\delta \right] \mathcal{R} \geq 2 \left[ 1 - \frac{L-1}{4L^2} - \frac{1}{2}L^2 \cdot L\phi^2 \cdot \frac{1}{2L^3\phi^2} \right] \mathcal{R} \geq \mathcal{R}.\end{aligned}$$

□

In addition, if  $D_l$ 's are approximately invariant, we can bound the weights  $\|W_l\|_2$ .

**Lemma A.3.** *Let  $\alpha = \max_{1 \leq l \leq L-1} \|W_l\|_2 \vee 1$ ,  $\beta = \|W_L\|_2$  and  $\phi = \max \left\{ \|W_{L:1}\|_2, \frac{e}{\sqrt{L}}, 1 \right\}$ . Assume that the invariant matrices  $\|D_l\|_2 \leq \delta$ ,  $l = 1, \dots, L-2$  and  $\|I + D_{L-1}\|_2 \leq \varepsilon$ , where  $\delta \leq (2L^3\phi^2)^{-1}$  and  $\varepsilon \leq (4L^2)^{-1}$ . Then*

$$\alpha^{2(L-1)} < L\phi^2, \quad \alpha^{2(L-1)}\beta^2 < 2\phi^2. \quad (\text{A.3})$$

*Proof.* We first use the invariant matrices to bound the difference between  $\|W_l\|_2$ . Since

$$\begin{aligned}\|I + D_{L-1}\|_2 &= \|I + W_L^\top W_L - W_{L-1}W_{L-1}^\top\|_2 \\ &\geq \left| \|I + W_L^\top W_L\|_2 - \|W_{L-1}W_{L-1}^\top\|_2 \right| = |1 + \|W_L\|_2^2 - \|W_{L-1}\|_2^2|,\end{aligned}$$

we have  $|1 + \beta^2 - \|W_{L-1}\|_2^2| \leq \varepsilon$ . In addition,

$$\|D_l\|_2 = \|W_{l+1}^\top W_{l+1} - W_l W_l^\top\|_2 \geq \left| \|W_{l+1}^\top W_{l+1}\|_2 - \|W_l W_l^\top\|_2 \right| = \left| \|W_{l+1}\|_2^2 - \|W_l\|_2^2 \right|$$

for  $l = 1, \dots, L-2$ , then  $|1 + \beta^2 - \|W_l\|_2^2| \leq \varepsilon + (L-l-1)\delta$ , thus  $|1 + \beta^2 - \alpha^2| \leq \varepsilon + (L-2)\delta$ .

From Lemma A.1,

$$\begin{aligned}W_{L:1}W_{L:1}^\top &= W_L [W_{L-1:1}W_{L-1:1}^\top] W_L^\top \\ &\succeq W_L \left[ (W_{L-1}W_{L-1}^\top)^{L-1} - \frac{1}{2}\alpha^{2(L-2)}L^2\delta I \right] W_L^\top \\ &\succeq W_L \left[ (I + W_L^\top W_L - \delta I)^{L-1} - \frac{1}{2}\alpha^{2(L-2)}L^2\delta I \right] W_L^\top,\end{aligned}$$

where  $A \succeq B$  means the matrix  $A - B$  is positive semi-definite. So

$$\begin{aligned}\|W_{L:1}W_{L:1}^\top\|_2 &\geq \left\| W_L \left[ (I + W_L^\top W_L - \delta I)^{L-1} - \frac{1}{2}\alpha^{2(L-2)}L^2\delta I \right] W_L^\top \right\|_2 \\ &= \beta^2 \left[ (1 + \beta^2 - \varepsilon)^{L-1} - \frac{1}{2}\alpha^{2(L-2)}L^2\delta \right] \\ &\geq \beta^2 \left[ (\alpha^2 - 2\varepsilon - (L-2)\delta)^{L-1} - \frac{1}{2}\alpha^{2(L-2)}L^2\delta \right] \\ &\geq \beta^2 \left[ \alpha^{2(L-1)} - (L-1)(2\varepsilon + (L-2)\delta) - \frac{1}{2}\alpha^{2(L-2)}L^2\delta \right], \\ &\geq \beta^2 \left[ \alpha^{2(L-1)} - \frac{(L-1)^2}{L^3} - \frac{1}{4L}\alpha^{2(L-2)} \right] \\ &\geq \frac{1}{2}\alpha^{2(L-1)}\beta^2\end{aligned}$$

since  $\delta \leq (2L^3)^{-1}$  and  $\varepsilon \leq (4L^2)^{-1}$ . Therefore,  $\alpha^{2(L-1)}\beta^2 \leq 2\|W_{L:1}W_{L:1}^\top\|_2 \leq 2\phi^2$ .

Finally, assume that  $\alpha^{2(L-1)} \geq L\phi^2$ , then

$$\begin{aligned}\alpha^2 &\geq (L\phi^2)^{1/(L-1)} = \exp \left[ \frac{\log(L\phi^2)}{L-1} \right] > 1 + \frac{\log(L\phi^2)}{L-1}, \\ \beta^2 &\geq \frac{\log(L\phi^2)}{L-1} - \varepsilon - (L-2)\delta \geq \frac{2}{L-1} - \frac{1}{4L^2} - \frac{L-2}{2L^3} > \frac{2}{L},\end{aligned}$$

where  $\log(L\phi^2) \geq 2$  comes from  $\phi \geq \frac{\epsilon}{\sqrt{L}}$ . Thus

$$\|W_{L:1}W_{L:1}^\top\|_2 \geq \frac{1}{2}\alpha^{2(L-1)}\beta^2 > \frac{1}{2} \cdot L\phi^2 \cdot \frac{2}{L} = \phi^2,$$

which is a contradiction! Therefore  $\alpha^{2(L-1)} < L\phi^2$ , and we complete the proof of the lemma.  $\square$

## A.2 One-step analysis

We denote the one-step update as

$$W_l^+ = W_l - \eta \nabla_l \mathcal{R}, \quad l = 1, \dots, L.$$

In this section, we always denote  $A^+$  as the value of a variable  $A$  after one-step update, for example  $\mathcal{R}^+$ ,  $W_{l_2:l_1}^+$  and  $D_l^+$ . We will estimate the change of invariant matrix  $D_l^+ - D_l$  and the change of loss  $\mathcal{R}^+ - \mathcal{R}$  in one step.

**Lemma A.4.** Assume that  $\|W_l\|_2 \leq \alpha$ ,  $l = 1, \dots, L-1$  and  $\|W_L\|_2 \leq \beta$ , where  $1 \leq \alpha^{2(L-1)} < L\phi^2$  and  $\alpha^{2(L-1)}\beta^2 < 2\phi^2$  for some  $\phi > 0$ . Then

$$\begin{aligned} \|\nabla_l \mathcal{R}\|_F^2 &\leq 4\phi^2 \mathcal{R}, \quad l = 1, \dots, L-1, \\ \|\nabla_L \mathcal{R}\|_F^2 &\leq 2L\phi^2 \mathcal{R}. \end{aligned}$$

*Proof.* For  $l = 1, \dots, L-1$ ,

$$\begin{aligned} \|\nabla_l \mathcal{R}\|_F &= \left\| W_{L:(l+1)}^\top (W_{L:1} - \Phi) W_{(l-1):1}^\top \right\|_F \leq \|W_{L:(l+1)}\|_2 \|W_{L:1} - \Phi\|_F \|W_{(l-1):1}\|_2 \\ &\leq \alpha^{L-2} \beta \sqrt{2\mathcal{R}} \leq 2\phi \sqrt{\mathcal{R}}. \end{aligned}$$

And similarly,  $\|\nabla_L \mathcal{R}\|_F \leq \alpha^{L-1} \sqrt{2\mathcal{R}} \leq \phi \sqrt{2L\mathcal{R}}$ .  $\square$

**Lemma A.5.** Under the same conditions as Lemma A.4, the change of invariant matrices under one-step update satisfies

$$\begin{aligned} \|D_l^+ - D_l\|_2 &\leq 8\eta^2 \phi^2 \mathcal{R}, \quad l = 1, \dots, L-2, \\ \|D_{L-1}^+ - D_{L-1}\|_2 &\leq 2\eta^2 (L+2) \phi^2 \mathcal{R}. \end{aligned}$$

*Proof.* Recall the invariance condition

$$\nabla_l \mathcal{R} W_l^\top = W_{L:(l+1)}^\top (W_{L:1} - \Phi) W_{l:1}^\top = W_{l+1}^\top \nabla_{l+1} \mathcal{R},$$

we have

$$\begin{aligned} D_l^+ &= (W_{l+1}^+)^\top W_{l+1}^+ - W_l (W_l^+)^\top \\ &= (W_{l+1} - \eta \nabla_{l+1} \mathcal{R})^\top (W_{l+1} - \eta \nabla_{l+1} \mathcal{R}) - (W_l - \eta \nabla_l \mathcal{R}) (W_l - \eta \nabla_l \mathcal{R})^\top \\ &= W_{l+1}^\top W_{l+1} - W_l W_l^\top \\ &\quad - \eta [W_{l+1}^\top \nabla_{l+1} \mathcal{R} + \nabla_l \mathcal{R} W_l^\top + \nabla_{l+1}^\top \mathcal{R} W_{l+1} - W_l \nabla_l^\top \mathcal{R}] \\ &\quad + \eta^2 [\nabla_{l+1}^\top \mathcal{R} \nabla_{l+1} \mathcal{R} + \nabla_l \mathcal{R} \nabla_l^\top \mathcal{R}] \\ &= D_l + \eta^2 [\nabla_{l+1}^\top \mathcal{R} \nabla_{l+1} \mathcal{R} + \nabla_l \mathcal{R} \nabla_l^\top \mathcal{R}]. \end{aligned}$$

Combining with Lemma A.4, we can complete the proof.  $\square$

**Lemma A.6.** Under the same conditions as Lemma A.2, for learning rate

$$\eta \leq \min \left\{ \frac{1}{64L^2\phi^3\sqrt{\mathcal{R}}}, \frac{1}{144L^2\phi^4} \right\},$$

the decrease of the loss function in one-step update satisfies

$$\mathcal{R}^+ \leq \left(1 - \frac{\eta}{2}\right) \mathcal{R}.$$

*Proof.* First we expand  $W_{L:1}^+$  as a polynomials of  $\eta$ :

$$W_{L:1}^+ = \prod_{l=1}^L (W_l - \eta \nabla_l \mathcal{R}) = A_0 + \eta A_1 + \eta^2 A_2 + \cdots + \eta^L A_L,$$

where the coefficients  $A_k \in \mathbb{R}^{d \times d}$ . Obviously  $A_0 = W_{L:1}$ .

$$\begin{aligned} \mathcal{R}^+ - \mathcal{R} &= \frac{1}{2} \left[ \|W_{L:1}^+ - \Phi\|_F^2 - \|W_{L:1} - \Phi\|_F^2 \right] \\ &= \frac{1}{2} (W_{L:1}^+ - W_{L:1}) : (W_{L:1}^+ + W_{L:1} - 2\Phi) \\ &= \frac{1}{2} (W_{L:1}^+ - W_{L:1}) : (2(W_{L:1} - \Phi) + (W_{L:1}^+ - W_{L:1})) \\ &= (W_{L:1}^+ - W_{L:1}) : (W_{L:1} - \Phi) + \frac{1}{2} \|W_{L:1}^+ - W_{L:1}\|_F^2, \end{aligned}$$

where  $A : B = \sum_{i,j} A_{ij} B_{ij}$ . We can write

$$\mathcal{R}^+ - \mathcal{R} = I_1 + I_2 + I_3,$$

where

$$I_1 = \eta A_1 : (W_{L:1} - \Phi), \quad I_2 = \sum_{k=2}^L \eta^k A_k : (W_{L:1} - \Phi), \quad I_3 = \frac{1}{2} \left\| \sum_{k=1}^L \eta^k A_k \right\|_F^2.$$

For  $I_1$ , we have

$$\begin{aligned} I_1 &= A_1 : (W_{L:1} - \Phi) = -\eta \sum_{l=1}^L (W_{L:l+1} \nabla_l \mathcal{R} W_{l-1:1}) : (W_{L:1} - \Phi) \\ &= -\eta \sum_{l=1}^L \nabla_l \mathcal{R} : [W_{L:l+1}^\top (W_{L:1} - \Phi) W_{l-1:1}^\top] = -\eta \sum_{l=1}^L \|\nabla_l \mathcal{R}\|_F^2. \end{aligned}$$

From Lemma A.2,

$$I_1 \leq -\eta \|\nabla_L \mathcal{R}\|_F^2 \leq -\eta \mathcal{R}.$$

For  $I_2$  and  $I_3$ , we further expand  $W_{L-1:1}^+$  as

$$W_{L-1:1}^+ = \prod_{l=1}^{L-1} (W_l - \eta \nabla_l \mathcal{R}) = B_0 + \eta B_1 + \eta^2 B_2 + \cdots + \eta^{L-1} B_{L-1}.$$

From Lemma A.4,  $\|\nabla_l \mathcal{R}\|_F \leq \gamma = 2\phi\sqrt{\mathcal{R}}$ ,  $l = 1, \dots, L-1$ , then for  $k \geq 1$ ,

$$\|B_k\|_F \leq \binom{L-1}{k} \alpha^{L-1-k} (2\phi\sqrt{\mathcal{R}})^k.$$

We use the following inequalities for  $0 \leq y \leq x/L^2$ :

$$(x+y)^L \leq 2x^L, \quad (x+y)^L \leq x^L + 2Lx^{L-1}y, \quad (x+y)^L \leq x^L + Lx^{L-1}y + L^2x^{L-2}y^2.$$

Since  $2\eta\phi\sqrt{\mathcal{R}} \leq \alpha/L^2$ ,

$$\begin{aligned} \left\| \sum_{k=0}^{L-1} \eta^k B_k \right\|_2 &\leq \left( \alpha + 2\eta\phi\sqrt{\mathcal{R}} \right)^{L-1} \leq 2\alpha^{L-1}, \\ \left\| \sum_{k=1}^{L-1} \eta^k B_k \right\|_F &\leq \left( \alpha + 2\eta\phi\sqrt{\mathcal{R}} \right)^{L-1} - \alpha^{L-1} \leq 2L\alpha^{L-2} \cdot 2\eta\phi\sqrt{\mathcal{R}} = 4\eta L\alpha^{L-2}\phi\sqrt{\mathcal{R}}, \\ \left\| \sum_{k=2}^{L-1} \eta^k B_k \right\|_F &\leq \left( \alpha + 2\eta\phi\sqrt{\mathcal{R}} \right)^{L-1} - \alpha^{L-1} - (L-1)\alpha^{L-2} \cdot 2\eta\phi\sqrt{\mathcal{R}} \\ &\leq L^2\alpha^{L-3} (2\eta\phi\sqrt{\mathcal{R}})^2 = 4\eta^2 L^2 \alpha^{L-3} \phi^2 \mathcal{R}. \end{aligned}$$

Notice that  $A_k = W_L B_k - \nabla_L \mathcal{R} B_{k-1}$ ,  $k = 1, \dots, L$  where  $\|W_L\|_2 \leq \beta$  and  $\|\nabla_L \mathcal{R}\|_F \leq \alpha^{L-1} \sqrt{2\mathcal{R}}$ , then

$$\begin{aligned} \left\| \sum_{k=1}^L \eta^k A_k \right\|_F &\leq \|W_L\|_2 \left\| \sum_{k=1}^L \eta^k B_k \right\|_F + \eta \|\nabla_L \mathcal{R}\|_F \left\| \sum_{k=0}^L \eta^k B_k \right\|_2 \\ &\leq \beta \cdot 4\eta L \alpha^{L-2} \phi \sqrt{\mathcal{R}} + \eta \alpha^{L-1} \sqrt{2\mathcal{R}} \cdot 2\alpha^{L-1} \\ &\leq 4\eta L \phi^2 \sqrt{2\mathcal{R}} + 2\eta L \alpha^2 \phi^2 \sqrt{2\mathcal{R}} \\ &= 6\eta L \phi^2 \sqrt{2\mathcal{R}}, \end{aligned}$$

$$\begin{aligned} \left\| \sum_{k=2}^L \eta^k A_k \right\|_F &\leq \|W_L\|_2 \left\| \sum_{k=2}^L \eta^k B_k \right\|_F + \eta \|\nabla_L \mathcal{R}\|_F \left\| \sum_{k=1}^L \eta^k B_k \right\|_F \\ &\leq \beta \cdot 4\eta^2 L^2 \alpha^{L-3} \phi^2 \mathcal{R} + \eta \alpha^{L-1} \sqrt{2\mathcal{R}} \cdot 4\eta L \alpha^{L-2} \phi \sqrt{\mathcal{R}} \\ &\leq 4\sqrt{2} \eta^2 L^2 \phi^3 \mathcal{R} + 4\sqrt{2} \eta^2 L^2 \phi^3 \mathcal{R} \\ &= 8\sqrt{2} \eta^2 L^2 \phi^3 \mathcal{R}. \end{aligned}$$

So

$$\begin{aligned} I_2 &\leq \left\| \sum_{k=2}^L \eta^k A_k \right\|_F \|W_{L:1}(k) - \Phi\|_F \leq 16\eta^2 L^2 \phi^3 \mathcal{R}^{3/2}, \\ I_3 &= \frac{1}{2} \left\| \sum_{k=1}^L \eta^k A_k \right\|_F^2 \leq 36\eta^2 L^2 \phi^4 \mathcal{R}. \end{aligned}$$

For  $\eta \leq \min \left\{ \left( 64L^2 \phi^3 \sqrt{\mathcal{R}} \right)^{-1}, \left( 144L^2 \phi^4 \right)^{-1} \right\}$ , we have  $I_2 \leq \eta \mathcal{R}/4$  and  $I_3 \leq \eta \mathcal{R}/4$ . Therefore,

$$\mathcal{R}^+ - \mathcal{R} = I_1 + I_2 + I_3 \leq -\eta \mathcal{R} + \frac{1}{4} \eta \mathcal{R} + \frac{1}{4} \eta \mathcal{R} = -\frac{1}{2} \eta \mathcal{R}.$$

□

### A.3 Proof of Theorem 4.3

Now we are ready to prove the main Theorem 4.3.

*Proof of Theorem 4.3.* Let  $\alpha(t) = \max_{1 \leq l \leq L-1} \|W_l(t)\|_2 \vee 1$ , and  $\beta(t) = \|W_L(t)\|_2$ . We will proof the following two statements by induction:

$$\alpha^{2(L-1)}(t) < L\phi^2, \quad \alpha^{2(L-1)}(t)\beta^2(t) < 2\phi^2, \quad (\text{A.4})$$

$$\mathcal{R}(t) \leq \left( 1 - \frac{\eta}{2} \right)^t \mathcal{R}(0). \quad (\text{A.5})$$

Recall that  $\phi = \max \left\{ 2\|\Phi\|_F, \frac{e}{\sqrt{L}}, 1 \right\}$ .

The statements hold for  $t = 0$  since  $\alpha(0) = 1$  and  $\beta(0) = 0$ . Assume that the statements hold for  $0, 1, \dots, t$ , now consider  $t + 1$ .

From the induction assumption,  $\mathcal{R}(t) \leq \mathcal{R}(0) = \phi^2/8$ , then  $\eta \leq (144L^2\phi^4)^{-1} < (64L^2\phi^3\sqrt{\mathcal{R}(t)})^{-1}$  satisfies the requirement of Lemma A.6. So (A.5) holds for  $t + 1$ . Furthermore,

$$\|W_{L:1}(t+1)\|_2 \leq \|W_{L:1}(t+1)\|_F \leq \|\Phi\|_F + \sqrt{2\mathcal{R}(t+1)} \leq \|\Phi\|_F + \sqrt{2\mathcal{R}(0)} \leq \phi.$$

The invariant matrices  $D_l(0) = 0$ ,  $l = 1, \dots, L-2$  and  $I + D_{L-1}(0) = 0$  for initialization. From Lemma A.5, each update

$$\|D_l(s+1) - D_l(s)\|_2 \leq 8\eta^2 \phi^2 \mathcal{R}(s)$$

for  $l = 1, \dots, L - 2$  and  $s = 0, 1, \dots, t$ . From the induction assumption,

$$\sum_{s=0}^t \mathcal{R}(s) \leq \mathcal{R}(0) \sum_{s=0}^t \left(1 - \frac{\eta}{2}\right)^s \leq \frac{2}{\eta} \mathcal{R}(0) = \frac{\phi^2}{4\eta},$$

then

$$\|D_l(t+1)\|_2 \leq \sum_{s=0}^t \|D_l(s+1) - D_l(s)\|_2 \leq 8\eta^2 \phi^2 \sum_{s=0}^t \mathcal{R}(s) \leq 2\eta \phi^4 \leq \frac{1}{2L^3 \phi^2}$$

since  $\eta \leq (4L^3 \phi^6)^{-1}$ . Similarly,  $\|I + D_{L-1}(t+1)\|_2 \leq 4\eta(L+2)\phi^2 < (4L^2)^{-1}$ . Now from Lemma A.3, the statement (A.4) holds for  $t+1$ . Then we complete the induction.  $\square$
